# Supplementary material for: Influence of component molar ratios of conjugated polymers on the anode performance in lithium-ion batteries
Source: Royal Society of Chemistry journal article supplement (doi:10.1039/d4ta04593a), 2024-01-01
Supplement: d4ta04593a1.pdf [file d4ta04593a1.pdf]

## Supporting Information for

# Influence of component molar ratios of conjugated polymers on the anode performance in lithium-ion batteries

Detian Ma, Hui Xu, Yahui Zhang, Yuxuan Yang, Yunfei Bai,\* Jincui Wu and Xiaobo Pan\*

State Key Laboratory of Applied Organic Chemistry (Lanzhou University), Lanzhou Magnetic Resonance Center, College of Chemistry and Chemical Engineering, Lanzhou University, Lanzhou 730000, People's Republic of China. E-mail: baiyf20@lzu.edu.cn (Yunfei Bai) and boxb@lzu.edu.cn (Xiaobo Pan).



solid crude product was purified by silica gel chromatographic column ( $V_{\text{petroleum ether}}: V_{\text{dichloromethane}} = 2:1$ ) to obtain a white solid **M2**. yield (2.6 g, 53.8%).  $^1\text{H NMR}$  (400 MHz,  $\text{CDCl}_3$ ):  $\delta$  8.27 (s, 2H), 8.04-8.06 (d,  $J = 8.0$  Hz, 2H), 7.79-7.81 (d,  $J = 8.0$  Hz, 2H), 1.36 (s, 24H).

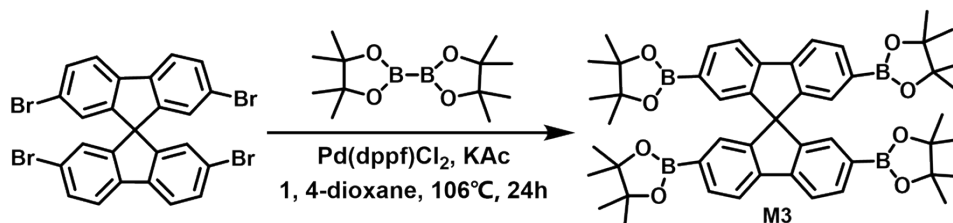

### The synthetic procedures the Monomer 3 (**M3**):

Monomer 3 (**M3**): Synthesis of 2,2',7,7'-tetraborate-9,9'-spirobifluorene (**M3**): Under argon atmosphere, 2,2',7,7'-tetrabromo-9,9'-spirobifluorene (1.60 g, 2.53 mmol), pinacol bis(boronic acid) ester (4.50 g, 17.70 mmol), potassium acetate (3.47 g, 35.42 mmol) and [1,1'-bis (diphenylphosphino) ferrocene] palladium (II) dichloride (0.37 g, 0.46 mmol) was dissolved in 150 mL of tetrahydrofuran and reacted at 70 °C for 72 hours. After the reaction was cooled to room temperature, it was extracted with  $\text{CH}_2\text{Cl}_2$  for 3 times, the combined organic phases were washed with water twice and dried with anhydrous magnesium sulfate. The organic solvent was removed by rotary evaporation, and the solid crude product was purified by silica gel chromatographic column ( $V_{\text{petroleum ether}}: V_{\text{dichloromethane}} = 2:1$ ) to obtain a white solid **M3**. yield (1.58 g, 76.6%).  $^1\text{H NMR}$  (400 MHz,  $\text{CDCl}_3$ ):  $\delta$  7.85 (q,  $J = 8.0$  Hz, 8H), 7.09 (s, 4H), 1.25 (s, 48H).

### The synthetic procedures the SFSO polymer:

All polymers were synthesized by the Pd-catalyzed Suzuki-Miyaura coupling method using the general procedure that the monomer,  $\text{Pd}(\text{PPh}_3)_4$ ,  $\text{K}_2\text{CO}_3$ , were dissolved in a mixture of deoxidized  $\text{N,N}$ -dimethylformamide and water under argon atmosphere, the reaction was heated up to 130 °C for 48 hours. After cooling to room temperature, an insoluble solid was obtained by filtration and the solid product was washed with water, methanol, dichloromethane, tetrahydrofuran and acetone to remove residual palladium catalyst. Finally, it was extracted with tetrahydrofuran Soxhlet for 48 hours.

Synthesis of the polymer **SFSO-1**: monomer **M3** (0.41 g, 0.50 mmol), 2,2',7,7'-tetrabromo-9,9'-spirobifluorene (0.316 g, 0.50 mmol), K<sub>2</sub>CO<sub>3</sub> (0.830 g, 6.0 mmol), Pd(PPh<sub>3</sub>)<sub>4</sub> (0.013 g, 8.7 μmol), 16 mL of N,N-dimethylformamide and 3 mL of water were used for this reaction. A green powdery solid was obtained, yield: 0.246 g, 85% yield.

Synthesis of the polymer **SFSO-2**: monomer **M1** (0.063 g, 0.17 mmol), monomer **M2** (0.234 g, 0.50 mmol), 2,2',7,7'-tetrabromo-9,9'-spirobifluorene (0.105 g, 0.17 mmol), K<sub>2</sub>CO<sub>3</sub> (0.830 g, 6.0 mmol), Pd(PPh<sub>3</sub>)<sub>4</sub> (0.013 g, 8.7 μmol), 16 mL of N,N-dimethylformamide and 3 mL of water were used for this reaction. A green powdery solid was obtained, yield: 0.171 g, 83% yield.

Synthesis of the polymer **SFSO-3**: monomer **M1** (0.112 g, 0.30 mmol), monomer **M2** (0.234 g, 0.50 mmol), 2,2',7,7'-tetrabromo-9,9'-spirobifluorene (0.063 g, 0.10 mmol), K<sub>2</sub>CO<sub>3</sub> (0.830 g, 6.0 mmol), Pd(PPh<sub>3</sub>)<sub>4</sub> (0.013 g, 8.7 μmol), 16 mL of N,N-dimethylformamide and 3 mL of water were used for this reaction. A green powdery solid was obtained, yield: 0.202 g, 98% yield.

Synthesis of the polymer **SFSO-4**: monomer **M1** (0.159 g, 0.424 mmol), monomer **M2** (0.234 g, 0.50 mmol), 2,2',7,7'-tetrabromo-9,9'-spirobifluorene (0.025 g, 0.039 mmol), K<sub>2</sub>CO<sub>3</sub> (0.830 g, 6.0 mmol), Pd(PPh<sub>3</sub>)<sub>4</sub> (0.013 g, 8.7 μmol), 16 mL of N,N-dimethylformamide and 3 mL of water were used for this reaction. A green powdery solid was obtained, yield: 0.192 g, 96% yield.

Synthesis of the polymer **SFSO-5**: monomer **M1** (0.187 g, 0.50 mmol), monomer **M2** (0.234 g, 0.50 mmol), K<sub>2</sub>CO<sub>3</sub> (0.830 g, 6.0 mmol), Pd(PPh<sub>3</sub>)<sub>4</sub> (0.013 g, 8.7 μmol), 16 mL of N,N-dimethylformamide and 3 mL of water were used for this reaction. A green powder was obtained, yield: 0.218 g, 84% yield.

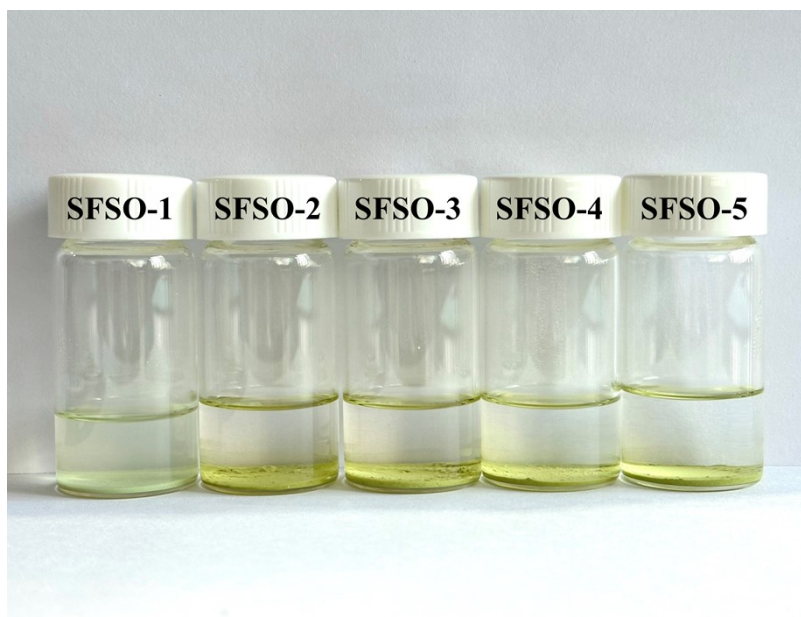

**Fig. S1** The photograph of SFSO-1 ~ SFSO-5 in electrolyte solvent for a fortnight.

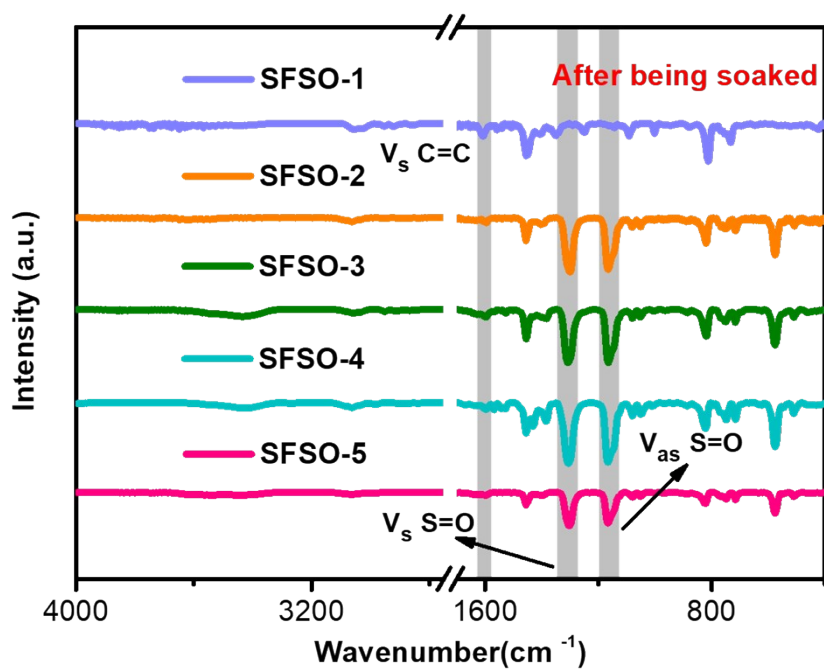

**Fig. S2** The FT-IR spectra of SFSO-1 ~ SFSO-5 after immersion in electrolyte solvent.

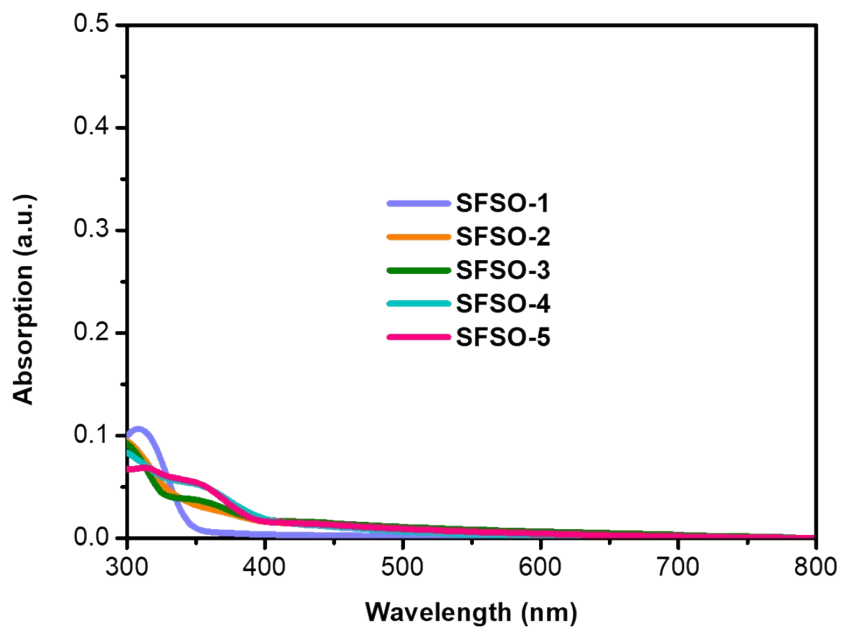

**Fig. S3** UV-Vis absorption spectra of **SFSO-1** ~ **SFSO-5** in electrolyte solvent.

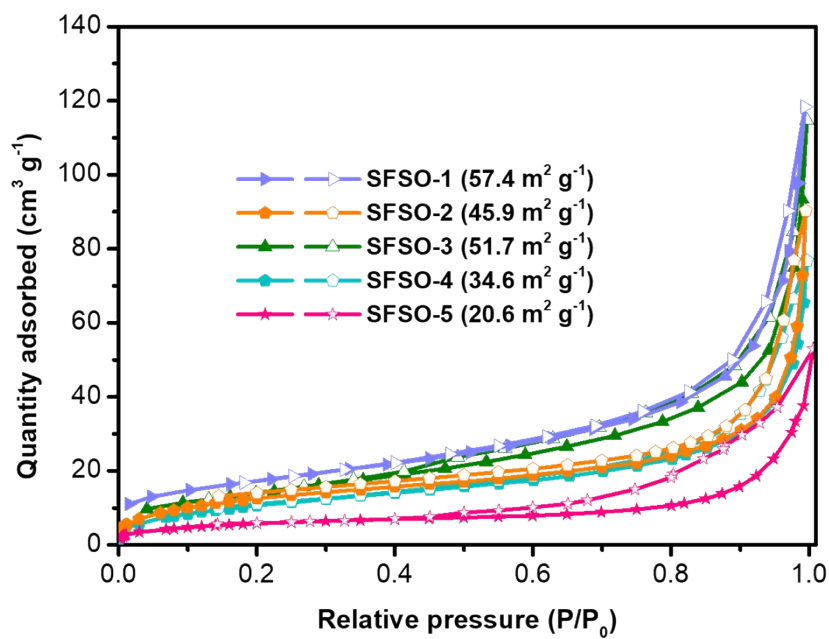

**Fig. S4** Nitrogen adsorption (solid)-desorption (hollow) isotherms of **SFSO-1** ~ **SFSO-5**.

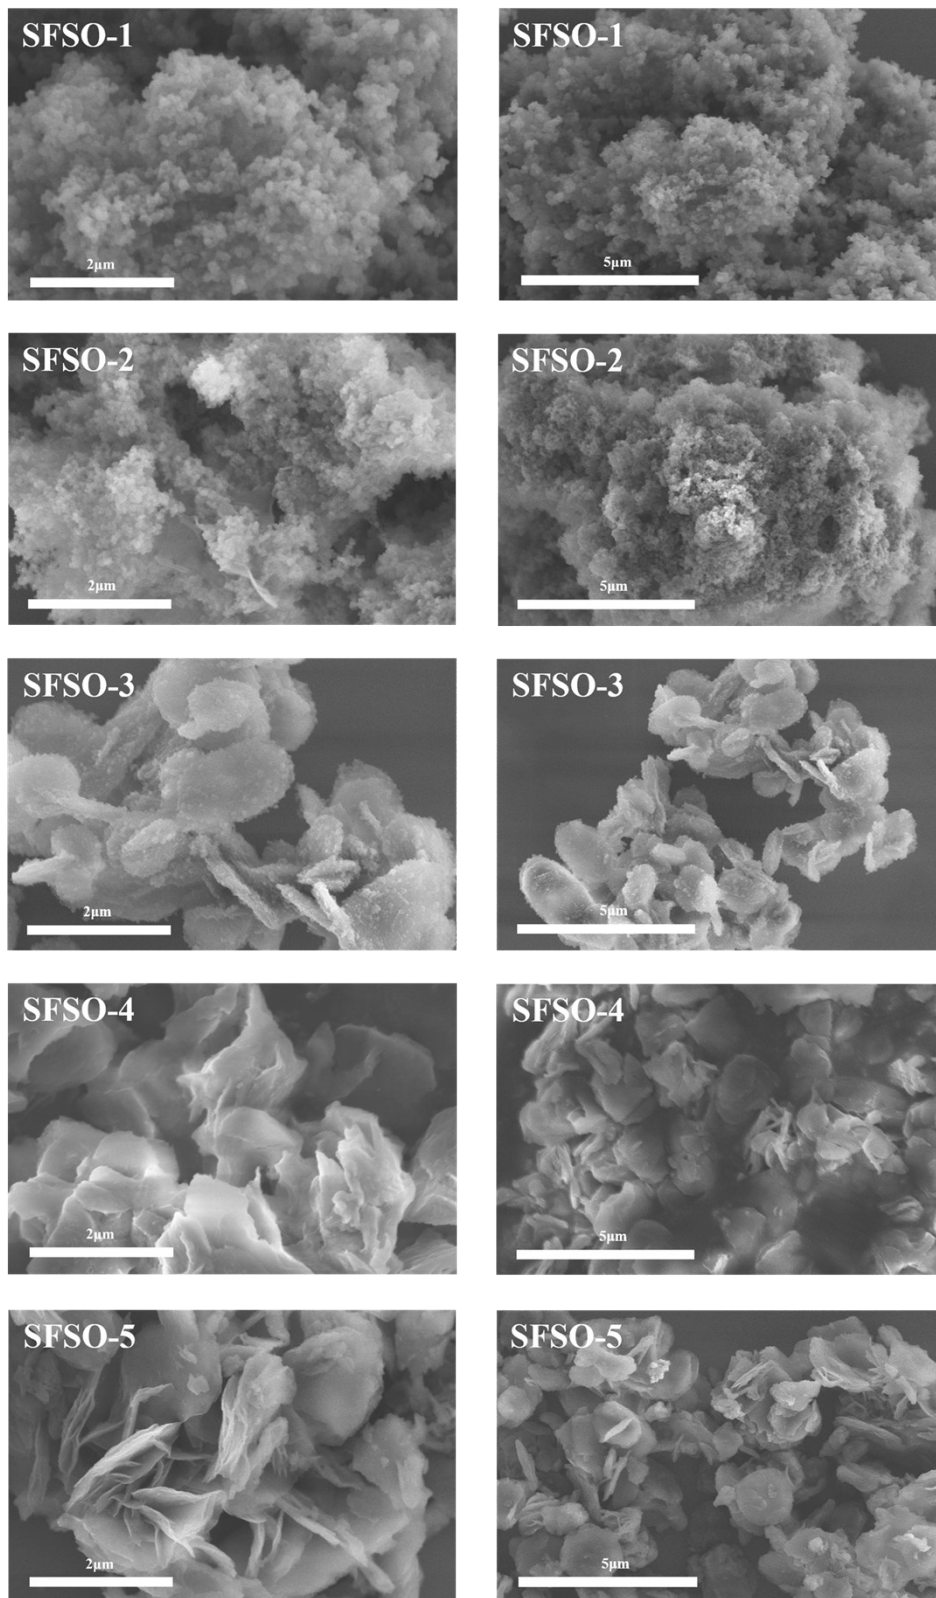

**Fig. S5** The SEM images of SFSO-1 ~ SFSO-5

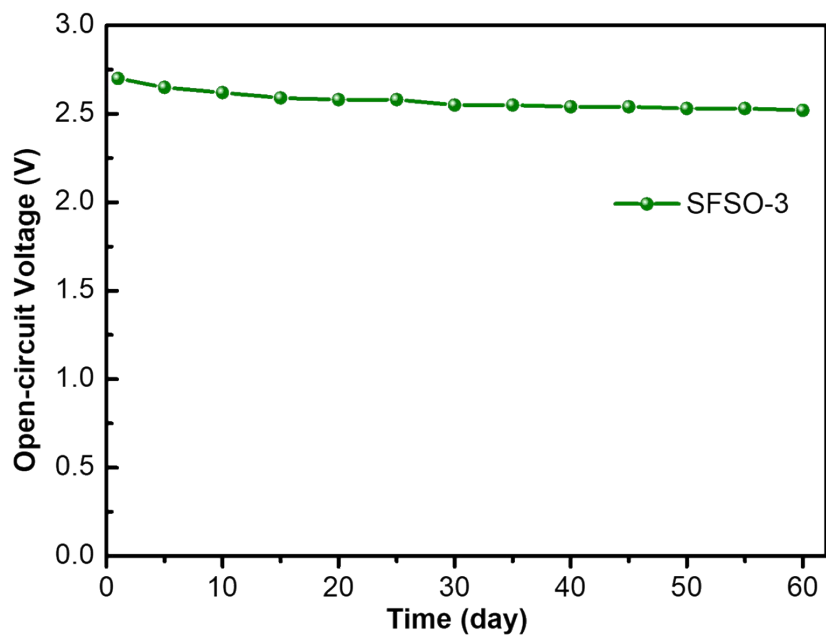

**Fig. S6** Self-discharge curve of SFSO-3 left at room temperature for two months.

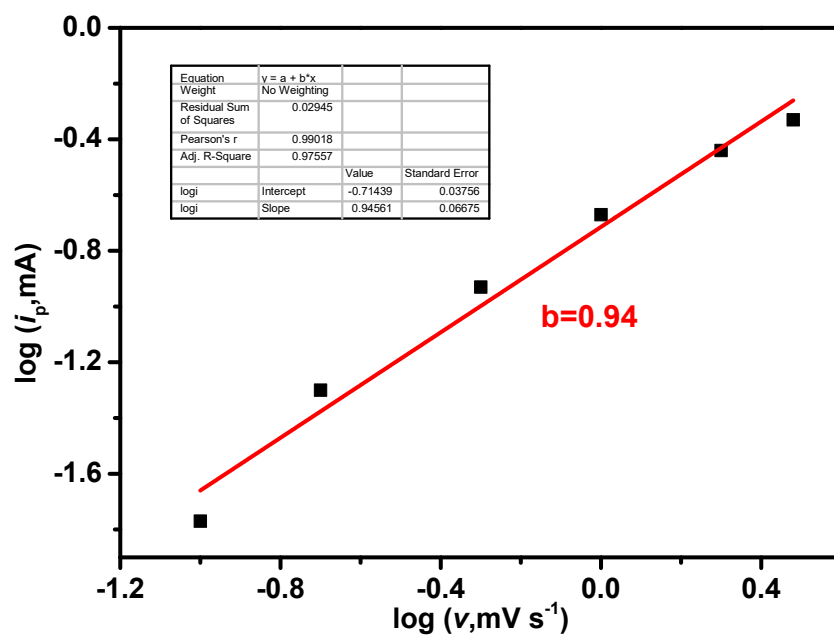

**Fig. S7** The fitted linear relationship between log (scan rate) and log (peak current).



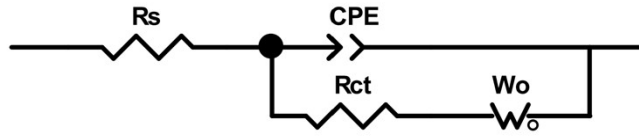

**Fig. S8** The equivalent electrical circuit model to fitting EIS spectra.  $R_s$ : electrolyte resistance,  $R_{ct}$ : charge transfer resistance, CPE: constant phase element, and  $W_o$ : Warburg impedance.

**Table S1** Fitted values of the elements in the equivalent circuit of the EIS data used to measure the **SFSO** electrodes.

|               | $R_s$ ( $\Omega$ ) | CPE-T                 | CPE-P | $R_{ct}$ ( $\Omega$ ) | $W_o$ -R | $W_o$ -T | $W_o$ -P |
|---------------|--------------------|-----------------------|-------|-----------------------|----------|----------|----------|
| <b>SFSO-1</b> | 2.064              | $4.17 \times 10^{-5}$ | 0.658 | 206.2                 | 289.7    | 0.575    | 0.412    |
| <b>SFSO-2</b> | 1.427              | $4.04 \times 10^{-5}$ | 0.714 | 263.5                 | 317.4    | 2.624    | 0.418    |
| <b>SFSO-3</b> | 1.268              | $3.14 \times 10^{-5}$ | 0.647 | 138.5                 | 273.7    | 2.168    | 0.416    |
| <b>SFSO-4</b> | 1.718              | $3.51 \times 10^{-5}$ | 0.716 | 198.1                 | 305.7    | 2.331    | 0.417    |
| <b>SFSO-5</b> | 1.993              | $7.22 \times 10^{-5}$ | 0.611 | 362                   | 202.2    | 3.683    | 0.413    |

The Li ion diffusion coefficients ( $D_{Li^+}$ ,  $cm^2 s^{-1}$ ) were obtained based on the EIS data through the equation:<sup>1-3</sup>

$$D = 0.5 \left( \frac{RT}{AF^2 \sigma C} \right)^2$$

where R is the gas constant ( $8.314 J mol^{-1} K^{-1}$ ), T is the temperature (298.5 K), A is the area of the electrode surface, F is the Faraday's constant ( $9.65 \times 10^4 C mol^{-1}$ ),  $\sigma$  is the Warburg coefficient and C is the molar concentration of  $Li^+$ .

The Warburg coefficient  $\sigma$  can be evaluated from equation:

$$Z_{re} = R_e + R_{ct} + \sigma \omega^{-0.5}$$

where  $Z_{re}$  is the real impedance in EIS data,  $R_e$  is the resistance of the electrolyte,  $R_{ct}$  is the charge transfer resistance,  $\omega$  is the angular frequency in the low frequency region and  $\sigma$  is the slope for the plot of  $Z_{re}$  vs.  $\omega^{-0.5}$ .

**Table S2** Warburg coefficients ( $\sigma$ ) and Li ion diffusion coefficients ( $D_{Li^+}$ ) obtained from EIS data

|                                               | SFSO-1                 | SFSO-2                 | SFSO-3                 | SFSO-4                 | SFSO-5                 |
|-----------------------------------------------|------------------------|------------------------|------------------------|------------------------|------------------------|
| $\sigma$ (s cm <sup>-2</sup> )                | 81.6                   | 92.2                   | 58.5                   | 76.5                   | 122.9                  |
| $D_{Li^+}$ (cm <sup>2</sup> s <sup>-1</sup> ) | $4.18 \times 10^{-12}$ | $3.21 \times 10^{-12}$ | $1.63 \times 10^{-11}$ | $4.75 \times 10^{-12}$ | $1.84 \times 10^{-12}$ |

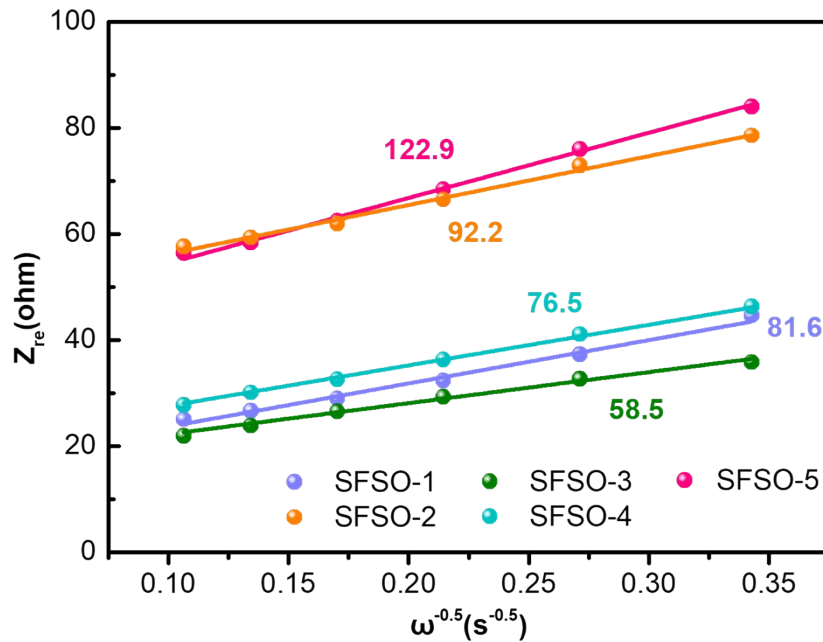

**Fig. S9** The relationship between  $Z_{re}$  and  $\omega^{-0.5}$  at low frequencies for SFSO polymers.

Sample pieces for electronic conductivity measurements were approximately 13 mm in diameter and were prepared by molding polymer powder samples at 20 MPa without any conductive carbon black or binder. The sample piece was then placed in a specific mold connected to the instrument. The resistance value ( $R$ ) of the polymer material was obtained by parallel testing. The electronic conductivity ( $\kappa$ ) was finally calculated by the equation:<sup>4,5</sup>

$$R = \frac{U}{I} = \rho \frac{L}{S}$$

$$\kappa = \frac{1}{\rho} = \frac{L}{SR}$$

Where  $\rho$  is the resistivity of the polymer material, L is the distance between two probes (cm), S is the contact surface area between the sample piece and the probe (0.29 cm<sup>2</sup>), R is the resistance of the polymer material ( $\Omega$ ).

**Table S3** The data obtained by the two-probe approach. The resistance of sheet polymer; the thickness of sheet polymer and calculated polymer conductivity.

|                                                   | SFSO-1                | SFSO-2                | SFSO-3                | SFSO-4               | SFSO-5               |
|---------------------------------------------------|-----------------------|-----------------------|-----------------------|----------------------|----------------------|
| <b>R-1 (<math>\Omega</math>)</b>                  | 10045.41              | 9124.529              | 5599.774              | 5960.755             | 6934.474             |
| <b>R-2 (<math>\Omega</math>)</b>                  | 10054.82              | 9256.926              | 5621.078              | 5834.333             | 7004.642             |
| <b>R-3 (<math>\Omega</math>)</b>                  | 10226.63              | 9374.738              | 5644.382              | 5897.637             | 7196.507             |
| <b><math>\bar{R}</math> (<math>\Omega</math>)</b> | 10108.953             | 9252.206              | 5621.74               | 5897.575             | 7045.208             |
| <b><math>\delta</math> (cm)</b>                   | 0.037                 | 0.018                 | 0.038                 | 0.036                | 0.030                |
| <b><math>\kappa</math> (S cm<sup>-1</sup>)</b>    | 1.26 $\times 10^{-5}$ | 1.93 $\times 10^{-5}$ | 2.33 $\times 10^{-5}$ | 2.1 $\times 10^{-5}$ | 6.7 $\times 10^{-6}$ |

- 1 Z. Ma, Y. Peng, G. Wang, Y. Fan, J. Song, T. Liu, X. Qin and G. Shao, *Electrochim. Acta*, 2015, **156**, 77-85.
- 2 S. Wang, Q. Wang, P. Shao, Y. Han, X. Gao, L. Ma, S. Yuan, X. Ma, J. Zhou, X. Feng and B. Wang, *J. Am. Chem. Soc.*, 2017, **139**, 4258-4261.
- 3 L. Zhong, Z. Fang, C. Shu, C. Mo, X. Chen and D. Yu, *Angew. Chem., Int. Ed.*, 2021, **60**, 10164-10171.
- 4 S. Chandra, T. Kundu, K. Dey, M. Addicoat, T. Heine and R. Banerjee, *Chem. Mater.*, 2016, **28**, 1489-1494.
- 5 S. Zhang, W. Huang, P. Hu, C. Huang, C. Shang, C. Zhang, R. Yang and G. Cui, *J. Mater. Chem. A*, 2015, **3**, 1896-1901.
